# Supplementary material for: Developing and validating a prognostic prediction model for patients with chronic kidney disease stages 3–5 based on disease conditions and intervention methods: a retrospective cohort study in China
Source: HighWire-hosted journal article supplement (doi:10.1136/bmjopen-2021-054989), 2022-05-01
Supplement: bmjopen-2021-054989supp008_data_supplement.pdf [file bmjopen-2021-054989supp008_data_supplement.pdf]

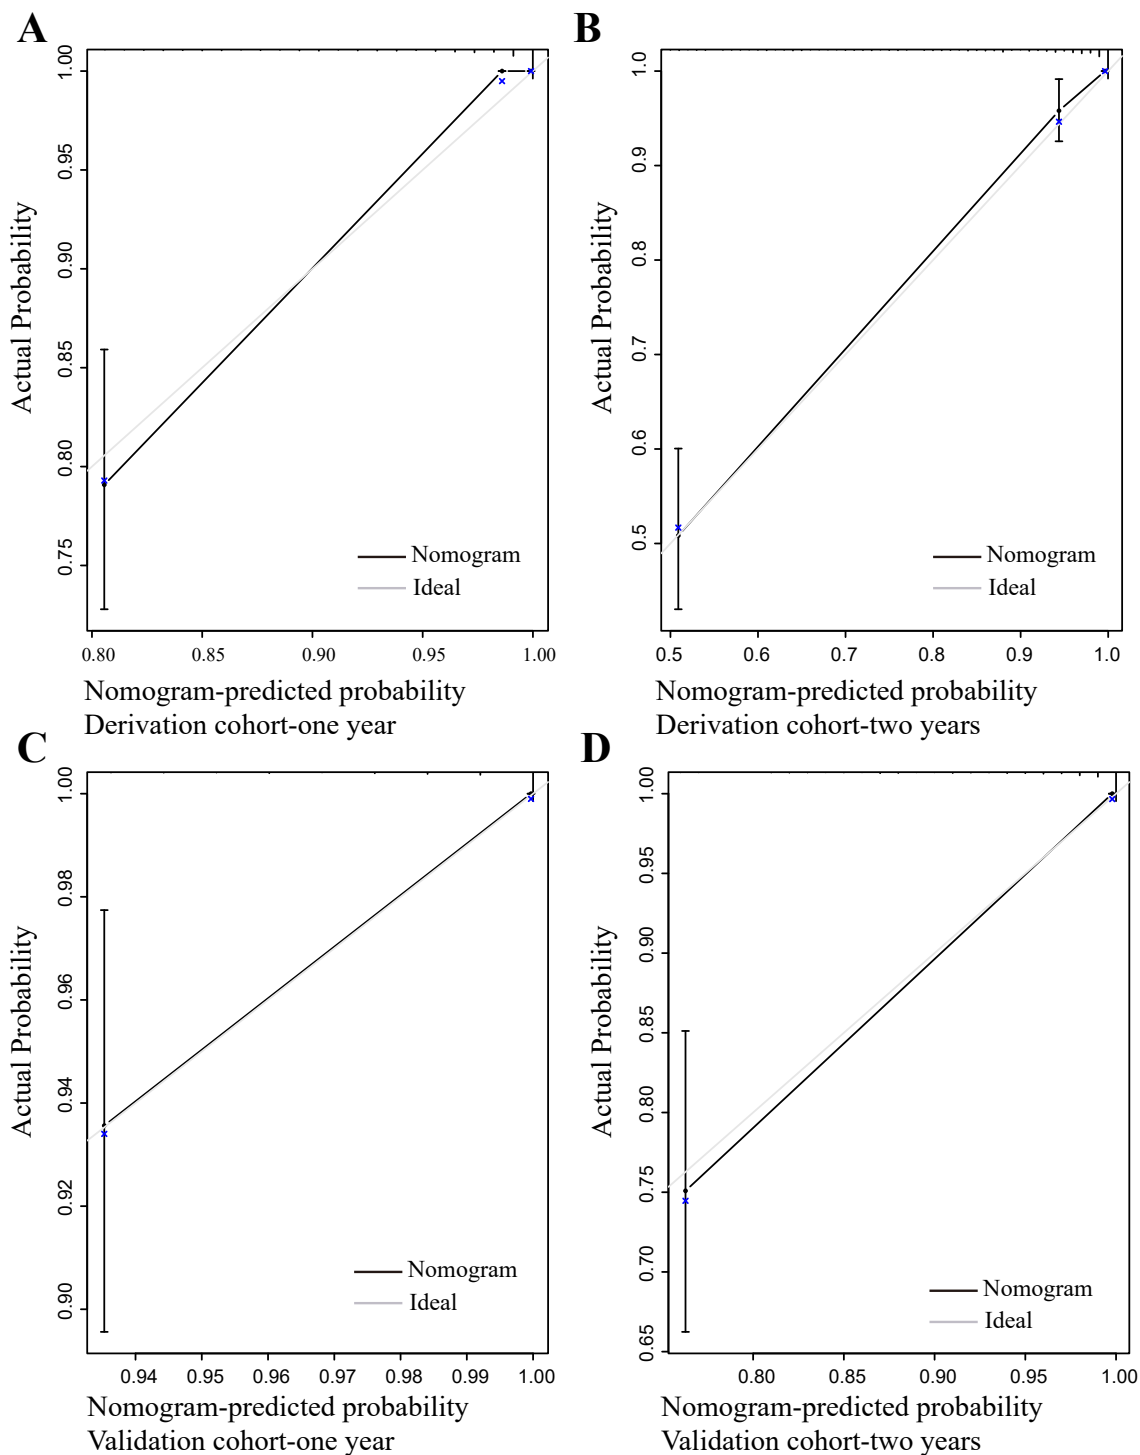

Figure S7 Calibration curves for Model D

(A) Derivation cohort, 1 year, (B) Derivation cohort, 2 years, (C) Validation cohort, 1 year, (D) Validation cohort, 2 years
